# Supplementary material
Source: PubMed Central journal article supplement (PMC10198065)
Supplement: NIHMS1844199-supplement-1.pdf [file NIHMS1844199-supplement-1.pdf]

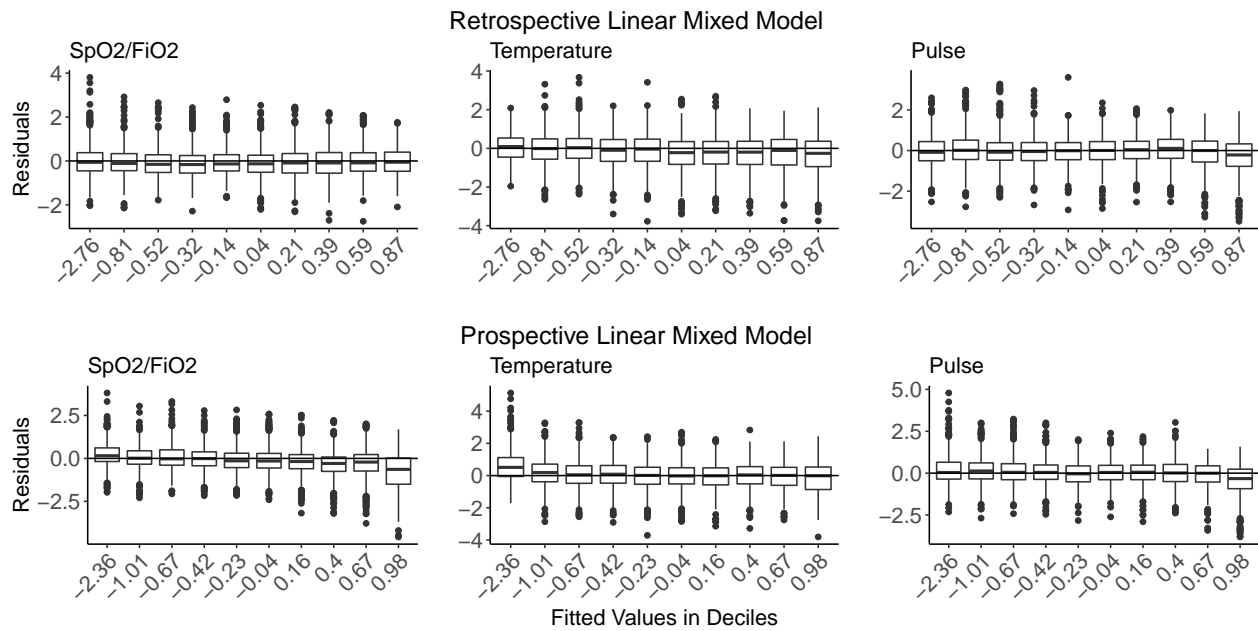

FIG S1. Residuals vs. fitted values in deciles boxplot of prospective (bottom) and retrospective (top) linear mixed effects models for 3 selected biomarkers.

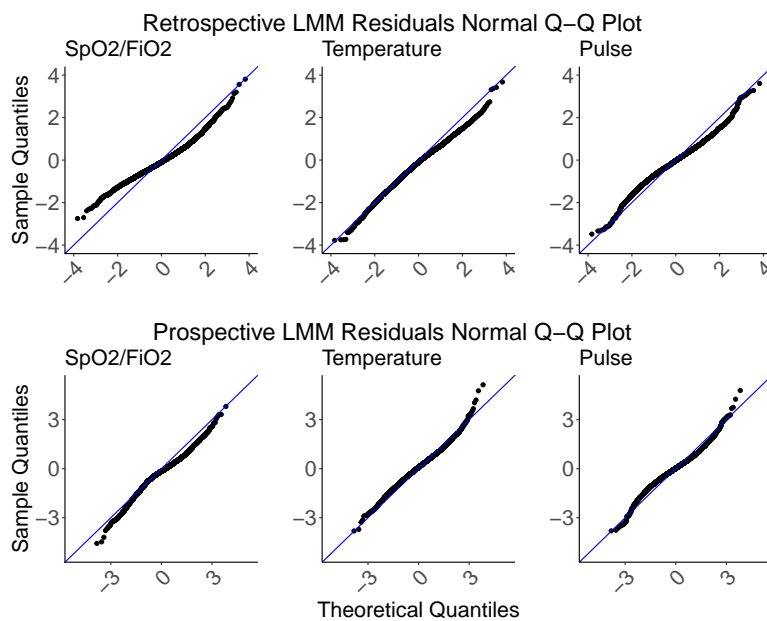

FIG S2. Normal Q-Q plot for residuals of prospective (bottom) and retrospective (top) linear mixed effects models for 3 selected biomarkers.
